# Supplementary material for: Recent progress on CO 2 separation membranes
Source: Royal Society of Chemistry journal article supplement (doi:10.1039/d4ra00444b), 2024-01-01
Supplement: d4ra00444b1.pdf [file d4ra00444b1.pdf]

## Supporting information

# Recent progress on membranes for CO<sub>2</sub> separation

*Yuheng Fan<sup>a</sup>, Weichu Yu<sup>\*a, b</sup>, Aibin Wu<sup>a</sup>, Wenming Shu<sup>a</sup>, Ying Zhang<sup>a</sup>*

<sup>a</sup> College of Chemistry & Environmental Engineering, Yangtze University, Jingzhou, Hubei 434023, P. R. China

<sup>b</sup> Hubei Engineering Research Centers for Clean Production and Pollution Control of Oil and Gas Fields, Jingzhou, Hubei 434023, P. R. China

\*Corresponding author email: [yuweichu@126.com](mailto:yuweichu@126.com)

Table S1-Comparison of this contribution with other published review articles

| Year              | Field                      | Topic reviewed                                                                                                                                                                         |
|-------------------|----------------------------|----------------------------------------------------------------------------------------------------------------------------------------------------------------------------------------|
| 2014 <sup>1</sup> | CO <sub>2</sub> separation | research progress on metal organic framework membranes, the advantages of using MOFs in mixed matrix membranes and improvements in gas separation performances                         |
| 2016 <sup>2</sup> | CO <sub>2</sub> separation | various composite membrane preparation methods, advances in composite membranes for CO <sub>2</sub> /CH <sub>4</sub> separation                                                        |
| 2017 <sup>3</sup> | gas separation             | the performance and issues of various materials based hollow fiber mixed matrix membranes (HFMMMs) for CO <sub>2</sub> /CH <sub>4</sub> and CO <sub>2</sub> /N <sub>2</sub> separation |
| 2018 <sup>4</sup> | CO <sub>2</sub> separation | advances in the preparation, separation performance, and separation mechanism of supported IL membranes (SILMs), pure poly (ionic liquid) (PIL) membranes, PIL–                        |

|                    |                                           |                                                                                                                                                                                                                                                                                                                                                           |
|--------------------|-------------------------------------------|-----------------------------------------------------------------------------------------------------------------------------------------------------------------------------------------------------------------------------------------------------------------------------------------------------------------------------------------------------------|
| 2019 <sup>5</sup>  | CO <sub>2</sub> separation                | <p>copolymer membranes, PIL–IL composite membranes and polymer–IL composite membranes for CO<sub>2</sub> separation</p> <p>developments and advances of ionic liquids-based membranes for CO<sub>2</sub> separations in recent three years, with an emphasis on the strategy of incorporating ionic liquids and CO<sub>2</sub> separation performance</p> |
| 2020 <sup>6</sup>  | CO <sub>2</sub> separation                | <p>recent progress on thin film composite membranes, exploration of CO<sub>2</sub> separation membrane in pilot-scale are presented</p>                                                                                                                                                                                                                   |
| 2020 <sup>7</sup>  | separation applications in aqueous medium | <p>review the recent development of CO<sub>2</sub>-switchable membranes in aqueous medium in separation fields, challenges of CO<sub>2</sub>-switchable membranes</p>                                                                                                                                                                                     |
| 2021 <sup>8</sup>  | CO <sub>2</sub> separation                | <p>recent trends and emerging perspectives of ionic liquid membranes for CO<sub>2</sub> separation</p>                                                                                                                                                                                                                                                    |
| 2021 <sup>9</sup>  | CO <sub>2</sub> separation                | <p>the recent developments in terms of both Pebax-based thin film composite and mixed matrix membranes, thermal and water stabilities of these membranes</p>                                                                                                                                                                                              |
| 2022 <sup>10</sup> | gas separation                            | <p>development of amine-functionalized metal-organic frameworks hollow fiber mixed matrix membranes</p>                                                                                                                                                                                                                                                   |
| 2022 <sup>11</sup> | CO <sub>2</sub> separation                | <p>the types of natural polysaccharides that are used in membrane processes for CO<sub>2</sub> separation, effect of the functionalization of polysaccharides on CO<sub>2</sub> separation performance</p>                                                                                                                                                |
| 2022 <sup>12</sup> | CO <sub>2</sub> capture                   | <p>the advancement in TFC/TFN membranes for CO<sub>2</sub> sequestration, factors influencing TFC membranes</p>                                                                                                                                                                                                                                           |
| 2022 <sup>13</sup> | CO <sub>2</sub> separation                | <p>membrane fabrication methods, mechanisms, and modification of membranes for CO<sub>2</sub> separation</p>                                                                                                                                                                                                                                              |
| 2023 <sup>14</sup> | CO <sub>2</sub> separation                | <p>different types of PIL-based membranes for CO<sub>2</sub> separation (neat PIL membranes; PIL-IL composite membranes; PIL-polymer blend membranes; PIL-based block copolymer membranes, and PIL-based mixed matrix membranes)</p>                                                                                                                      |
| 2023 <sup>15</sup> | CO <sub>2</sub> separation                | <p>the advancement of these mixed matrix hollow fiber composite membranes (MM-HFCMs) for practical CO<sub>2</sub> separations</p>                                                                                                                                                                                                                         |

|                    |                            |                                                                                                                                                                                                                                 |
|--------------------|----------------------------|---------------------------------------------------------------------------------------------------------------------------------------------------------------------------------------------------------------------------------|
| 2023 <sup>16</sup> | CO <sub>2</sub> separation | preparation approaches of COF-based membranes, advances of COF-based membranes in separating various CO <sub>2</sub> mixed gases                                                                                                |
| 2023 <sup>17</sup> | CO <sub>2</sub> separation | facilitated transport theories derived from $\pi$ -complexation reactions, polymer electrolyte membranes and mixed matrix membranes as two strategies for fabricating CO <sub>2</sub> -facilitated transport membranes          |
| This work          | CO <sub>2</sub> separation | the progress in membrane separation mechanisms, the development of membrane materials, such as inorganic, polymer, and new membrane materials, the future development direction of carbon dioxide separation membrane materials |

Table S2. Gas separation performance of different membrane in earlier works

| type             | membrane                                                              | T (°C) | P(atm) | CO <sub>2</sub> permeability (Barrer) | CO <sub>2</sub> /gas selectivity |                |                 |
|------------------|-----------------------------------------------------------------------|--------|--------|---------------------------------------|----------------------------------|----------------|-----------------|
|                  |                                                                       |        |        |                                       | N <sub>2</sub>                   | H <sub>2</sub> | CH <sub>4</sub> |
| Silica membrane  | 10%Co-SiO <sub>2</sub> membrane <sup>18</sup>                         | 300    | 0.99   | -                                     | -                                | 6.61           | -               |
|                  | 10%Ni-SiO <sub>2</sub> membrane <sup>19</sup>                         | 50     | 1.00   | 6.4                                   | -                                | -              | 2.43            |
|                  | 0.04C-(0.9A-151) SiO <sub>2</sub> membrane <sup>20</sup>              | 75     | 0.20   | 13.4                                  | -                                | -              | 2.27            |
|                  | trifluoropropyl-SiO <sub>2</sub> membrane <sup>21</sup>               | 300    | 0.99   | -                                     | -                                | 6.93           | -               |
|                  | heptadecafluorodecyl modified SiO <sub>2</sub> membrane <sup>22</sup> | 300    | 1.00   | -                                     | -                                | 13.3           | 0               |
| Zeolite membrane | DDR-type membrane <sup>23</sup>                                       | 25     | 1.97   | 30                                    | -                                | -              | 200             |
|                  | Zeolite T membrane <sup>24</sup>                                      | 35     | 0.99   | 46                                    | -                                | -              | 400             |
|                  | chabazite membrane <sup>25</sup>                                      | 20     | 0.19   | 27                                    | 4.05                             | -              | -               |

|                                |                                                                                                         |    |      |       |       |     |      |
|--------------------------------|---------------------------------------------------------------------------------------------------------|----|------|-------|-------|-----|------|
|                                | OSDA-free CHA membrane <sup>26</sup>                                                                    | 75 | 1.00 | 100   | 12.5  | -   | -    |
|                                | Si-CHA membrane <sup>27</sup>                                                                           | 25 | 0.99 | 400   | -     | -   | 130  |
|                                | Si-CHA membrane <sup>28</sup>                                                                           | 25 | 1.97 | 120   | -     | -   | 480  |
|                                | All-silica CHA Nanocrystals membrane <sup>29</sup>                                                      | 30 | 8.88 | 780   | -     | -   | 32   |
|                                | Zeolite Y membrane <sup>30</sup>                                                                        | 30 | 1.36 | 9.6   | 503   | -   | -    |
|                                | GO layered membrane <sup>31</sup>                                                                       | 25 | 0.99 | 8500  | 20    | -   | -    |
|                                | ultra-thin GO membrane <sup>32</sup>                                                                    | 20 | 1    | -     | -     | -   | -    |
|                                | GO nanosheets membrane <sup>33</sup>                                                                    | 25 | 1.00 | -     | -     | 240 | -    |
| Graphene membrane              | Graphene oxide doped ionic liquid membrane <sup>34</sup>                                                | 25 | 1    | 37    | 130   | -   | -    |
|                                | Graphene mixed matrix membrane <sup>35</sup>                                                            | 25 | 0.99 | 1327  | 86.4  | -   | 72.2 |
|                                | GO / PEBA membrane <sup>36</sup>                                                                        | 25 | 2.96 | 97    | 86    | -   | -    |
|                                | GO mixed matrix membrane <sup>37</sup>                                                                  | 25 | 1.97 | 840   | -     | -   | -    |
|                                | $\gamma$ - Al <sub>2</sub> O <sub>3</sub> composite membranes <sup>38</sup>                             | 25 | 2.96 | 28.56 | 2.4   |     |      |
| Alumina-based ceramic membrane | AlOOH/Al <sub>2</sub> O <sub>3</sub> porous ceramics membrane <sup>39</sup>                             | 79 | 0.39 | -     | 0.8   |     |      |
|                                | $\alpha$ -alumina ceramic tube supported cellulose triacetate-tributyl phosphate membrane <sup>40</sup> | 30 | 1.97 | 4248  | 0.84  |     |      |
|                                | Industrial alumina based ceramic substrate amino silicate membrane <sup>41</sup>                        | 80 | 0.79 | 599   | 12.5  |     |      |
|                                | cellulose acetate separation membrane <sup>42</sup>                                                     | 25 | 4.93 | 520   | -     | -   | 12   |
|                                | cellulose membrane <sup>43</sup>                                                                        | 25 | 5    | 120   | 50    | 15  | 30   |
| Cellulose membrane             | cellulose/NMMO/water membrane <sup>44</sup>                                                             | 25 | 4.93 | 750   | 45    | 16  | 30   |
|                                | cellulose nanofiber membrane <sup>45</sup>                                                              | 35 | 0.99 | 13    | 35    | -   | 20   |
|                                | cellulose triacetate membranes <sup>46</sup>                                                            | 35 | 0.99 | 7.2   | -     | -   | 28   |
|                                | ethyl cellulose homogeneous membrane <sup>47</sup>                                                      | 30 | 0.99 | -     | 33    | -   | -    |
|                                | modified polyimide membrane <sup>48</sup>                                                               | 25 | 0.99 | 8.06  | -     | -   | 51   |
|                                | 6FDA-type polyimide membrane <sup>49</sup>                                                              | 35 | 1    | 65    | 30    | -   | -    |
| Polyimide membrane             | polyimide framework membrane <sup>50</sup>                                                              | 30 | 3    | 57.25 | 54.52 | -   | -    |
|                                | polyimide membrane <sup>51</sup>                                                                        | 35 | 2    | 1858  | 17.2  | -   | 18.9 |
|                                | 9FDA polyamide membrane <sup>52</sup>                                                                   | 25 | 1    | 12.26 | 26.65 | -   | 22.7 |

|                      |                                                                            |    |      |        |       |      |       |
|----------------------|----------------------------------------------------------------------------|----|------|--------|-------|------|-------|
|                      | polyimide membrane <sup>53</sup>                                           | 25 | 1    | 1.19   | -     | -    | 11.9  |
|                      | polyimide membrane <sup>54</sup>                                           | 35 | 4.42 | 150.5  | -     | -    | 27.5  |
|                      | polysulfone membrane <sup>55</sup>                                         | 25 | 1    | 12.73  | -     | -    | 28.9  |
|                      | PSF/PDMS membrane <sup>56</sup>                                            | 55 | 1    | 73.7   | -     | -    | 4.2   |
| Polysulfone membrane | PI/PSF membrane <sup>57</sup>                                              | 35 | 4.93 | 20     | -     | -    | 42    |
|                      | PSF/PES membrane <sup>58</sup>                                             | 25 | 5.92 | 22.5   | -     | -    | 6.5   |
|                      | mixed matrix membrane <sup>59</sup>                                        | 25 | 0.99 | 975    | 1.94  | -    | -     |
|                      | PAF-56P/PSF membrane <sup>60</sup>                                         | 25 | 1    | 141    | 38.9  | -    | -     |
|                      | F127/PIL membrane <sup>61</sup>                                            | 30 | 1.18 | 155.59 | 24.16 | -    | -     |
|                      | PSF/PDMS/Pebax1074 membrane <sup>62</sup>                                  | 25 | 2.96 | 424    | 41.3  | 13.5 | 11.4  |
| Polyether membrane   | polyether copolyamides membrane <sup>63</sup>                              | 25 | 1.97 | 100    | 50    | -    | -     |
|                      | PEG/ Pebax1657 membrane <sup>64</sup>                                      | 30 | 0.59 | 151    | 47    | 10.8 | 15.5  |
|                      | PEG/ Pebax1657/ PDMS membrane <sup>65</sup>                                | 35 | 3.95 | 532    | 36.1  | 10.6 | 10.8  |
|                      | polyether membrane <sup>66</sup>                                           | 35 | 0.99 | 131.61 | 30.12 | -    | 17.03 |
|                      | improved mixed-matrix membrane <sup>67</sup>                               | 35 | 2.96 | 1663   | 14.8  | -    | 16.9  |
|                      | NH <sub>2</sub> -MIL-53(Al)/CA mixed matrix membrane <sup>68</sup>         | 25 | 2.96 | 52.6   | 23.4  | -    | 28.7  |
| Composite membrane   | PI/UiO-66-PEI-pSBMA membrane <sup>69</sup>                                 | 35 | 0.99 | 28     | -     | -    | 56    |
|                      | TB/NH <sub>2</sub> -MIL-53(Al) mixed matrix membrane <sup>70</sup>         | 35 | 3.95 | 308    | 25.4  | -    | 23.6  |
|                      | composite membrane <sup>71</sup>                                           | 30 | 0.99 | 17.33  | 30.58 | -    | -     |
|                      | MOF-1 membrane <sup>72</sup>                                               | 25 | 4.98 | 255    | 410   | -    | 328   |
| MOF membrane         | CO <sub>2</sub> -selective metal-organic framework membranes <sup>73</sup> | 30 | 2.96 | 500    | 42    | -    | 95    |
|                      | ZIF-62 polycrystalline MOF membrane <sup>74</sup>                          | 25 | 0.99 | 2602   | 34.5  | -    | 36.6  |
|                      | COF-TpPa-1/ZIF-9 membrane <sup>75</sup>                                    | 25 | 1.58 | 551    | -     | -    | -     |
|                      | ZIF-7-NH <sub>2</sub> membrane <sup>76</sup>                               | 25 | 0.99 | 60     | -     | 19   | -     |
| ZIF membrane         | ZIF-9 membrane <sup>77</sup>                                               | 25 | 0.99 | 52.3   | -     | 21.5 | -     |
|                      | hybrid metal ZIF membrane <sup>78</sup>                                    | 55 | 0.99 | 54     | -     | 14.1 | -     |
|                      | ZIF-8@CNF membrane <sup>79</sup>                                           | 25 | 2.96 | 550    | 45.   | -    | 36.2  |

|                                      |                                                                             |    |      |        |       |      |      |
|--------------------------------------|-----------------------------------------------------------------------------|----|------|--------|-------|------|------|
|                                      |                                                                             |    |      |        | 5     |      |      |
|                                      | ZIF-8 membrane <sup>80</sup>                                                | 35 | 0.99 | -      | -     | 11.3 | -    |
|                                      | 6F-DABA-75-CM576 membrane <sup>81</sup>                                     | 35 | 3.95 | 3573   | -     | -    | 51.5 |
| CMS<br>membrane                      | CMS-600 membrane <sup>82</sup>                                              | 30 | 1.08 | 15060  | 26.8  | -    | 28.5 |
|                                      | PI100-600 membrane <sup>83</sup>                                            | 35 | 2    | 503    | 31    | -    | 56.5 |
|                                      | polysilsesquioxane CMS<br>membrane <sup>84</sup>                            | 35 | 1    | 354    | -     | -    | 56   |
|                                      | CMS70/PCF membrane <sup>85</sup>                                            | 35 | 2    | 14     | -     | -    | 101  |
|                                      | multi-layer asymmetric CMS<br>membrane <sup>86</sup>                        | 35 | 1    | 310    | -     | -    | 58.8 |
|                                      | cPIM-1/ PPN2 membrane <sup>87</sup>                                         | 25 | 1.97 | 11511  | 24.3  | -    | 22.2 |
| PIM<br>membrane                      | GO-POSS72 membrane <sup>88</sup>                                            | 25 | 0.99 | 12000  | 20.6  | -    | 12   |
|                                      | PIM-1/GO mixed matrix<br>membrane <sup>89</sup>                             | 30 | 3.95 | 6169   | 123.5 | -    | -    |
|                                      | PIM-PEG/PPG membrane <sup>90</sup>                                          | 30 | 1.97 | 1552.6 | 29.3  | -    | 16.7 |
|                                      | monoesterified PIM membrane <sup>91</sup>                                   | 35 | 1.97 | 7421   | 19.2  | -    | 11.5 |
| Facilitated<br>transport<br>membrane | pSBMA membrane <sup>92</sup>                                                | 35 | 1.97 | 104    | -     | -    | 82   |
|                                      | macromolecule PETEDA<br>membrane <sup>93</sup>                              | 27 | 1.89 | 81.4   | -     | -    | 52   |
|                                      | poly (amidoamine) dendrimer-<br>containing polymeric membrane <sup>94</sup> | 57 | 1    | 975    | 140   | -    | -    |
|                                      | thin composite membrane <sup>95</sup>                                       | 35 | 1.68 | 652    | 41    | -    | -    |
|                                      | CO <sub>2</sub> facilitated transfer membrane <sup>96</sup>                 | 30 | 4.93 | 98     | 70    | -    | -    |
|                                      | poly(N-vinylimidazole)-zinc <sup>97</sup><br>membrane                       | 30 | 0.99 | 1000   | 83    | -    | -    |

## References

1. S. R. Venna and M. A. Carreon, *Chemical Engineering Science*, 2014, **124**, 3-19.
2. Z. Dai, L. Ansaloni and L. Deng, *Green Energy & Environment*, 2016, **1**, 102-128.
3. M. Mubashir, Y. Y. Fong, C. T. Leng and L. K. Keong, *Chemical Engineering & Technology*, 2017, **41**, 235-252.
4. H. Gao, L. Bai, J. Han, B. Yang, S. Zhang and X. Zhang, *Chem Commun (Camb)*, 2018, **54**, 12671-12685.
5. S. Xiong, D. Yin, M. U. Javaid, L. Li, C. Pan, J. Tang and G. Yu, *Israel Journal of Chemistry*, 2019, **59**, 824-831.
6. C. Ma, M. Wang, Z. Wang, M. Gao and J. Wang, *Journal of CO2 Utilization*, 2020, **42**.
7. L. Dong and Y. Zhao, *Journal of Materials Chemistry A*, 2020, **8**, 16738-16746.
8. N. H. Solangi, A. Anjum, F. A. Tanjung, S. A. Mazari and N. M. Mubarak, *Journal of Environmental Chemical Engineering*, 2021, **9**.
9. A. S. Embaye, L. Martínez-Izquierdo, M. Malankowska, C. Téllez and J. Coronas, *Energy & Fuels*, 2021, **35**, 17085-17102.
10. N. Sunder, Y. Y. Fong, M. A. Bustam and N. H. Suhaimi, *Polymers (Basel)*, 2022, **14**.
11. F. Seidi, A. Arabi Shamsabadi, A. Ebadi Amooghin, M. R. Saeb, H. Xiao, Y. Jin and M. Rezakazemi, *Environmental Chemistry Letters*, 2022, **20**, 1083-1128.
12. M. H. Nematollahi, P. J. Carvalho, J. A. P. Coutinho and R. Abedini, *Energy & Fuels*, 2022, **36**, 12367-12428.
13. Linggaoa Shi, Li Sze Lai, Wee Horng Tay and Swee Pin Yeap, *ChemBioEng Reviews*, 2022, **9**, 556-573.
14. G. Bernardo and H. Gaspar, *Polymers (Basel)*, 2023, **15**.
15. F. Pazani, M. Shariatifar, M. Salehi Maleh, T. Alebrahim and H. Lin, *Separation and Purification Technology*, 2023, **308**.
16. B. Chen, H. Xie, L. Shen, Y. Xu, M. Zhang, M. Zhou, B. Li, R. Li and H. Lin, *Small*, 2023, **19**, e2207313.
17. S. Feng, X. Du, J. Luo, Y. Zhuang, J. Wang and Y. Wan, *Separation and Purification Technology*, 2023, **309**.
18. J. Yan, Q. Wei, X. Duan, J. He, Q. Li and Z. Nie, *Chinese Journal of Inorganic Chemistry*, 2011, **27**, 1334-1340.
19. W. Li, D. Li, L. Zheng, J. Fan and Z. Zhang, *Journal of the Chinese Ceramic Society*, 2014, **42**, 416-422.
20. Z. Zhang, Li. Zheng, D. Li and W. Li, *Journal of Shenyang University of Chemical Technology*, 2014, **28**, 308-313.
21. Z. Hong, Q. Wei, G. Li, X. Wang, Z. Nie and Q. Li, *Chinese Journal of Inorganic Chemistry*, 2013, **29**, 941-947.
22. Y. Ding, Q. Wei, X. Liu, Q. Li and Z. Nie, *Membrane Science and Technology*, 2014, **34**, 22-27.
23. S. Himeno, T. Tomita, K. Suzuki, K. Nakayama and K. Yajima, *Ind.eng.chem.res*, 2007, **46**, 6989-6997.
24. Y. Cui, H. Kita and K.-i. Okamoto, *Chemical Communications*, 2003, **17**, 2154-2155.
25. H. Gong, Masteral Thesis, Northeastern University, 2018.
26. E. Jang, S. Hong, E. Kim, N. Choi, S. J. Cho and J. Choi, *Journal of Membrane Science*, 2018, **549**, 46-59.

27. K. Kida, Y. Maeta and K. Yogo, *Separation and Purification Technology*, 2018, **197**, 116-121.
28. J. Zhou, F. Gao, K. Sun, X. Jin, Y. Zhang, B. Liu and R. Zhou, *Energy & Fuels*, 2020, **34**, 11307-11314.
29. L. Yu, A. Holmgren, M. Zhou and J. Hedlund, *Journal of Materials Chemistry A*, 2018, **6**, 6847-6853.
30. J. C. White, P. K. Dutta, K. Shqau and H. Verweij, *Langmuir*, 2010, **26**, 10287-10293.
31. H. W. Kim, H. W. Yoon, S.-M. Yoon, B. M. Yoo, B. K. Ahn, Y. H. Cho, H. J. Shin, H. Yang, U. Paik, S. Kwon, J.-Y. Choi and H. B. Park, *Science*, 2013, **342**, 91-95.
32. H. Li, Z. Song, X. Zhang, Y. Huang, S. Li, Y. Mao, H. J. Ploehn, Y. Bao and M. Yu, *Science*, 2013, **342**, 95-98.
33. C. Chi, X. Wang, Y. Peng, Y. Qian, Z. Hu, J. Dong and D. Zhao, *Chemistry of Materials*, 2016, **28**, 2921-2927.
34. M. Karunakaran, L. F. Villalobos, M. Kumar, R. Shevate, F. H. Akhtar and K. V. Peinemann, *Journal of Materials Chemistry A*, 2017, **5**, 649-656.
35. Q. Xin, F. Ma, L. Zhang, S. Wang, Y. Li, H. Ye, X. Ding, L. Lin, Y. Zhang and X. Cao, *Journal of Membrane Science*, 2019, **586**, 23-33.
36. J. Shen, M. Zhang, G. Liu and W. Jin, *RSC Advances*, 2016, **6**, 54281-54285.
37. J. Shen, G. Liu, K. Huang, Z. Chu, W. Jin and N. Xu, *ACS Nano*, 2016, **10**, 3398-3409.
38. B. Kang and H. Sang, *Journal of Material Science*, 1999, **34**, 1391-1398.
39. T. Isobe, Y. Takada, S. Matsushita and A. Nakajima, *Ceramics International*, 2015, **41**, 7759-7765.
40. K. Shankar and P. Kandasamy, *Greenhouse Gases: Science and Technology*, 2019, **9**, 287-305.
41. S. K. Sharma, B. K. Sanfui, A. Katare and B. Mandal, *ACS Applied Materials & Interfaces*, 2020, **12**, 40269-40284.
42. J. Hao, Z. Wang and S. Wang, *Polymer Materials Science & Engineering*, 1997, **13**, 65-69.
43. J. Wu, Ph.D. Thesis, Dalian Institute of Chemical Physics, Chinese Academy of Sciences, 2002.
44. X. Jie, Ph.D. Thesis, Dalian Institute of Chemical Physics, Chinese Academy of Sciences, 2005.
45. L. Ansaloni, J. Salas-Gay, S. Ligi and M. G. Baschetti, *Journal of Membrane Science*, 2017, **522**, 216-225.
46. H. T. Lu, S. Kanehashi, C. A. Scholes and S. E. Kentish, *Journal of Membrane Science*, 2017, **539**, 432-440.
47. X. Shang, S. Chen, X. Shi and Z. Zhu, *Chinese Journal of Chemical Physics*, 1997, **10**, 92-97.
48. P. Sysel, D. Maly, J. Vysohlid, K. Friess, K. Pilnacek, M. Lanc and O. Vopiccka, *Polymer Engineering & Science*, 2017, **57**, 1367-1373.
49. F. Jianhua, K. Hidetoshi and O. Ken-ichi, *Journal of Membrane Science*, 2001, **182**, 245-256.
50. E. M. Maya, D. M. Muñoz, J. G. de la Campa, J. de Abajo and Á. E. Lozano, *Desalination*, 2006, **199**, 188-190.
51. C. Zhang, P. Li and B. Cao, *Journal of Membrane Science*, 2017, **528**, 206-216.
52. T. Zhu, Masteral Thesis, Taiyuan University of Technology, 2018.
53. H. Si, H. Jia, P. Jiang, S. Zhao and S. Zhang, *Journal of Qiqihar University(Natural Science Edition)*, 2021, **37**, 77-80.
54. H. Eguchi, D. J. Kim and W. J. Koros, *Polymer*, 2015, **58**, 121-129.
55. M. Zhang, Masteral Thesis, Taiyuan University of Technology, 2015.
56. X. He, Masteral Thesis, Taiyuan University of Technology, 2018.



57. S. Shahid and K. Nijmeijer, *Separation and Purification Technology*, 2017, **189**, 90-100.
58. H. A. Mannan, H. Mukhtar, M. Shima Shaharun, M. R. Othman and T. Murugesan, *Journal of Applied Polymer Science*, 2015, **133**, 42496.
59. Y. Meng, Masteral Thesis, Lanzhou University of Technology, 2020.
60. L. Meng, Masteral Thesis, Tiangong University, 2016.
61. X. Zhou, J. Yan, H. Gao, A. Wang and Y. Bai, *New Chemical Materials*, 2018, **46**, 195-199.
62. Y. Wang, J. Ren, C. Xu, H. Li, S. Feng and M. Deng, *Membrane Science and Technology*, 2014, **34**, 27-32+48.
63. Q. Zhao, S. He, J. Lin and Q. Lin, *China Plastics*, 2019, **33**, 13-20.
64. A. Car, C. Stropnik, W. Yave and K.-V. Peinemann, *Journal of Membrane Science*, 2008, **307**, 88-95.
65. S. R. Reijerkerk, M. H. Knoef, K. Nijmeijer and M. Wessling, *Journal of Membrane Science*, 2010, **352**, 126-135.
66. X. Xiao, X. Xu, X. Li, J. Dong, X. Zhao and Q. Zhang, *Acta Polymerica Sinica*, 2022, **53**, 505-513.
67. T. Wu, Y. Shi, Y. Liu, I. Kumakiri, K. Tanaka, X. Chen and H. Kita, *Energy & Fuels*, 2021, **35**, 10680-10688.
68. M. Mubashir, Y. F. Yeong, K. K. Lau, T. L. Chew and J. Norwahyu, *Separation and Purification Technology*, 2018, **199**, 140-151.
69. B. Liu, Ph.D. Thesis, Harbin Institute of Technology, 2021.
70. C. Li, Masteral Thesis, China University of Petroleum (Beijing) 2019.
71. Y. Gao, Masteral Thesis, Shenyang University of Technology, 2021.
72. Z. Rui, J. B. James, A. Kasik and Y. S. Lin, *AIChE Journal*, 2016, **62**, 3836-3841.
73. D. S. Chiou, H. J. Yu, T. H. Hung, Q. Lyu, C. K. Chang, J. S. Lee, L. C. Lin and D. Y. Kang, *Advanced Functional Materials*, 2020, **31**, 2006924.
74. Y. Wang, H. Jin, Q. Ma, K. Mo, H. Mao, A. Feldhoff, X. Cao, Y. Li, F. Pan and Z. Jiang, *Angewandte Chemie International Edition*, 2020, **59**, 4365-4369.
75. M. Bu, Y. Feng, Q. Li, Y. Wang, S. Feng, K. Zhang, Y. Jiang, L. Fan, Z. Kang and D. Sun, *Inorganic Chemistry Frontiers*, 2021, **8**, 5016-5023.
76. H. Chang, Y. Wang, L. Xiang, D. Liu, C. Wang and Y. Pan, *Chemical Engineering Science*, 2018, **192**, 85-93.
77. J. Liu, C. Liu and A. Huang, *International Journal of Hydrogen Energy*, 2020, **45**, 703-711.
78. P.-H. Chang, Y.-T. Lee and C.-H. Peng, *Materials*, 2020, **13**, 5009.
79. M. Jia, X.-F. Zhang, Y. Feng, Y. Zhou and J. Yao, *Journal of Membrane Science*, 2020, **595**, 117579.
80. T.-M. T. Nguyen, J.-W. Chen, M.-T. Pham, H. M. Bui, C.-C. Hu, S.-J. You and Y.-F. Wang, *Environmental Technology & Innovation*, 2023, **31**, 103169.
81. Q. Wang, F. Huang, C. J. Cornelius and Y. Fan, *Journal of Membrane Science*, 2021, **621**, 118785.
82. M. Hou, L. Li, Z. He, R. Xu, Y. Lu, J. Zhang, Z. Pan, C. Song and T. Wang, *Journal of Membrane Science*, 2022, **656**, 120639.
83. J. M. Pérez-Francisco, J. L. Santiago-García, M. I. Loria-Bastarrachea, D. R. Paul, B. D. Freeman and M. Aguilar-Vega, *Journal of Membrane Science*, 2020, **597**, 117703.
84. J. H. Shin, H. J. Yu, H. An, A. S. Lee, S. S. Hwang, S. Y. Lee and J. S. Lee, *Journal of*

- Membrane Science*, 2019, **570-571**, 504-512.
85. J. Nie, F. Okada, H. Kita, K. Tanaka, T. Mihara, D. Kondo, Y. Yamashita and N. Yahagi, *Energy & Fuels*, 2022, **36**, 7147-7157.
86. Y. Cao, K. Zhang, O. Sanyal and W. J. Koros, *Angewandte Chemie International Edition*, 2019, **58**, 12149-12153.
87. W. Han, C. Zhang, M. Zhao, F. Yang, Y. Yang and Y. Weng, *Journal of Membrane Science*, 2021, **636**, 119544.
88. S. Mohsenpour, A. W. Ameen, S. Leaper, C. Skuse, F. Almansour, P. M. Budd and P. Gorgojo, *Separation and Purification Technology*, 2022, **298**, 121447.
89. M. Chen, F. Soyekwo, Q. Zhang, C. Hu, A. Zhu and Q. Liu, *Journal of Industrial and Engineering Chemistry*, 2018, **63**, 296-302.
90. I. Jeong, I. Hossain, A. Husna and T. H. Kim, *Macromolecular Materials and Engineering*, 2022, **308**, 2200596.
91. Y. Sun, J. Zhang, H. Li, F. Fan, Q. Zhao, G. He and C. Ma, *Separation and Purification Technology*, 2023, **314**, 123623.
92. 刘焯.
93. Z. Wang, M. Li, Y. Cai, J. Wang and S. Wang, *Journal of Membrane Science*, 2007, **290**, 250-258.
94. Z. Tong and W. S. W. Ho, *Separation Science and Technology*, 2016, **52**, 156-167.
95. S. Janakiram, X. Yu, L. Ansaloni, Z. Dai and L. Deng, *ACS Applied Materials & Interfaces*, 2019, **11**, 33302-33313.
96. M. Wang, Z. Wang, J. Wang, Y. Zhu and S. Wang, *Energy & Environmental Science*, 2011, **4**, 3955-3959.
97. K. Yao, Z. Wang, J. Wang and S. Wang, *Chemical Communications*, 2012, **48**, 1766-1768.
